# Supplementary material for: Sulfonic acid/sulfur trioxide (SO3H/SO3) functionalized two-dimensional MoS2 nanosheets for high-performance photocatalysis of organic pollutants
Source: Royal Society of Chemistry journal article supplement (doi:10.1039/d2nj02222b), 2022-01-01
Supplement: d2nj02222b1.pdf [file d2nj02222b1.pdf]

## Supplementary Information

### **Sulfonic acid/Sulfur trioxide (SO<sub>3</sub>H/SO<sub>3</sub>) functionalized two-dimensional MoS<sub>2</sub> nanosheets for high-performance photocatalysis of organic pollutants**

*Vivek Kumar Singh<sup>1</sup>, Prachi Jain<sup>1</sup>, Subrata Panda<sup>1</sup>, Biplob Kumar Kuila<sup>2</sup>, Sudhagar Pitchaimuthu<sup>3,#</sup>, Santanu Das<sup>1\*</sup>*

<sup>1</sup>*Department of Ceramic Engineering, Indian Institute of Technology (Banaras Hindu University), Varanasi Uttar Pradesh 221005, INDIA*

<sup>2</sup>*Department of Chemistry, Institute of Science, Banaras Hindu University, Varanasi 221005, UP, India*

<sup>3</sup>*Research Centre for Carbon Solutions, Institute of Mechanical, Processing and Energy Engineering, School of Engineering and Physical Sciences, Heriot-Watt University, Edinburgh, EH14 4AS, United Kingdom*

<sup>#</sup>*Past Affiliation: Materials Research Centre, Swansea University Swansea SA1 8EN Wales United Kingdom*

*\*Corresponding Author Email: [santanudas.cer@iitbhu.ac.in](mailto:santanudas.cer@iitbhu.ac.in); Fax: +91-542-2368428*

## S1. Experimental

**Chemicals:** The as-purchased chemicals were ultra-pure and used as received without further purification. Ammonium molybdate tetrahydrate ( $\text{H}_24\text{Mo}_7\text{N}_6\text{O}_{24}\cdot 4\text{H}_2\text{O}$ ) and bulk molybdenum (IV) sulfide ( $\text{MoS}_2$ ) powder ( $<2\mu\text{m}$ , 99%, CSA 1317-33-5) were bought from Sigma Aldrich, India. Thiourea ( $\text{H}_2\text{NCSNH}_2$ ) was bought from Merck Specialties Pvt. Ltd (India). Methylene blue ( $\text{C}_{16}\text{H}_{18}\text{ClN}_3\text{S}\cdot x\text{H}_2\text{O}$ ) was bought from S D Fine chem. Ltd (India). DI water used throughout all experiments was purified through a Millipore system.

**Synthesis of  $\text{SO}_3\text{H}/\text{SO}_3$  functionalized  $\text{MoS}_2$  Nanosheets:** The  $\text{SO}_3\text{H}/\text{SO}_3$  functionalized  $\text{MoS}_2$  Nanosheets were synthesized by hydrothermal process. In the typical process, about 2.067 g ammonium molybdate tetrahydrate ( $\text{H}_24\text{Mo}_7\text{N}_6\text{O}_{24}\cdot 4\text{H}_2\text{O}$ ) and 8.9 g thiourea ( $\text{H}_2\text{NCSNH}_2$ ) were first dissolved in 60 ml DI water. After that, the solution was constantly stirred for 20 min at 400 rpm to get a transparent solution. Then the solution was transferred to 100 ml Teflon lined stainless steel autoclave tightly sealed and maintained at 180 °C for 24 h in an electric oven. Afterward, the Teflon autoclave was naturally cooled down to room temperature (RT). After cooling to RT naturally, the resulting black solution was separated by centrifugation at 8000 rpm followed by washing three times with ethanol and deionized water (DI) respectively and dried at 80 °C for 12 h in a vacuum oven to obtain a  $\text{SO}_3\text{H}/\text{SO}_3$  functionalized  $\text{MoS}_2$  nanosheets.

**Material characterization:** Raman spectra was recorded using a  $\alpha$ -300 Access (WITec focus innovation, Germany) Raman spectrometer with an UHTS spectrometer inbuilt with 532 nm laser excitation at 1.5-2 mW power and 600 nm grating. The infrared spectrum of the samples was obtained by using an FT-IR spectrometer (Nicolet iS5, ThermoFisher Scientific,

USA) and spectra ranging from 4000 to 400  $\text{cm}^{-1}$  acquired. The X-ray photoelectron spectroscopy (XPS) spectra were obtained on XPS dispersive spectrometer (K-Alpha, Thermo Fisher Scientific, USA) with an Al  $K\alpha$  monochromatic X-ray beam of energy 4000 eV. The morphology of  $\text{SO}_3\text{H}/\text{SO}_3$  was characterized by a scanning electron microscope (Nova Nano SEM 450, FEI, Inc. USA). The phase and morphology of the catalysts were observed by using transmission electron microscopy (TEM) (TECNAI G2 20 TWIN, FEI, USA) techniques. All the TEM/HRTEM data were analyzed in GATAN (GATAN Inc., USA) software. UV-Visible (UV-Vis) spectral analysis was done by UV-Vis spectrophotometer (Model No: V-770, JASCO, Japan) operating in the spectral range of 200-800 nm. Phase and crystal structure was analyzed by Rigaku Miniflex (Rigaku Corporation, Japan) desktop X-ray diffraction (XRD) system with  $\text{Cu } K\alpha$  radiation (1.54 Å) and a  $2\theta$  scan range of  $5^\circ$ - $80^\circ$ . To evaluate the surface area, we performed the (Brunauer, Emmett and Teller) BET (Model- Autosorb IQ2, Quantachrome Instruments USA) measurement technique.

***Photocatalytic degradation of methylene blue under visible light:*** Photocatalytic degradation was conducted with different initial methylene blue (MB) concentrations and different  $\text{MoS}_2$ . About 5 mg of catalyst was added to an aqueous solution of MB dye (5 ml of 10 ppm). The entire assembly was kept inside of a laboratory-based closed light chamber with visible while LED source (light intensity:  $2 \text{ W/m}^2$ , and light spectrum: 360 to 700 nm). Before irradiation, the mixture was stirred in dark for a few minutes to attain adsorption-desorption equilibrium. In the defined intervals of time some amount of sample was taken, centrifuged and then the adsorption spectrum changes of MB were measured to monitor the MB photodegradation using JASCO V-770 UV-Vis Spectrophotometer. A similar

experiment is carried out with 5 ppm and 15 ppm MB dye. The Bulk MoS<sub>2</sub>, Pristine 2D-MoS<sub>2</sub>, and SO<sub>3</sub>H/SO<sub>3</sub>-MoS<sub>2</sub> were used as the photocatalyst.

## S2. X-ray photoelectron spectroscopy

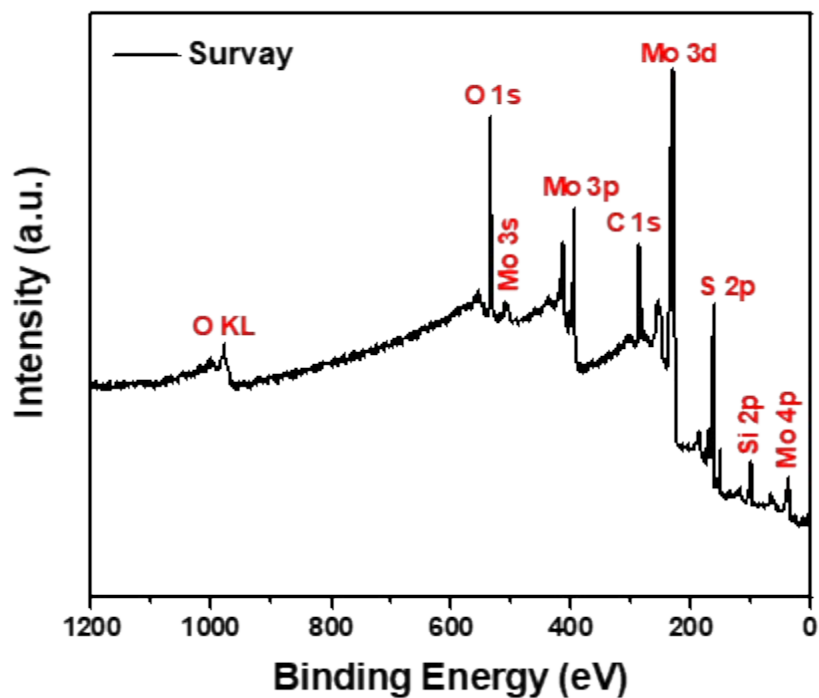

Figure S1: XPS survey spectrum obtained from the  $\text{SO}_3\text{H}/\text{SO}_3\text{-MoS}_2$  sample.

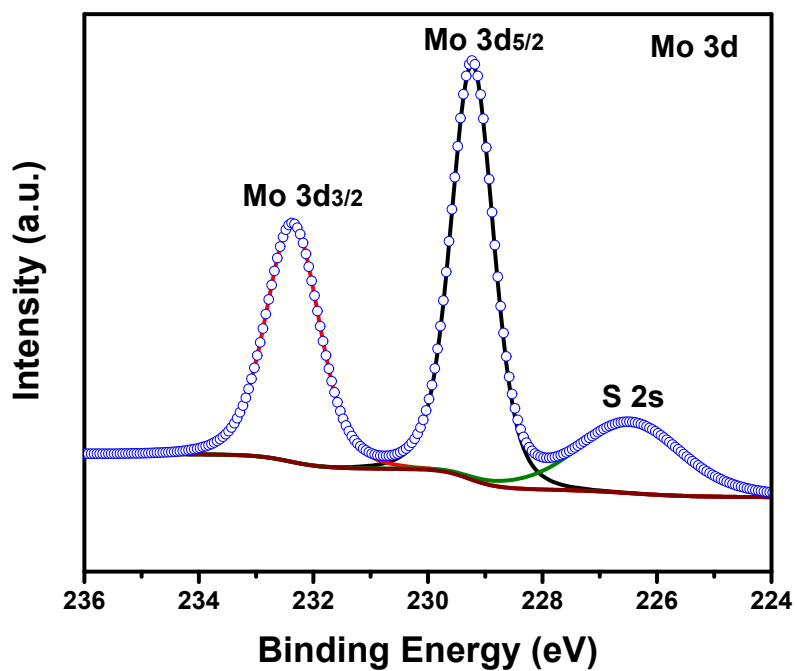

Figure S2: High-resolution XPS spectrum showing the characteristics Mo 3d peaks.

The surface chemical composition and oxidation states of the  $\text{SO}_3\text{H}/\text{SO}_3\text{-MoS}_2$  were investigated using X-ray photoelectron spectroscopy (XPS) as shown in **Fig. 1c** and **1d** and **Fig. S1** and **S2** (ESI). The XPS survey scan shows the presence of Mo 3d, S 2p, and O 1s peaks, as illustrated in **Fig. S1** (ESI). The atomic percentage of  $\text{SO}_3\text{H}/\text{SO}_3$  in  $\text{MoS}_2$  was determined to be 3.45% from the XPS survey analysis and the atomic ratio of Mo (22.93%): S (47.70%) was obtained as 1:2. The high-resolution Mo 3d spectrum shown in **Fig. S2** (ESI) was deconvoluted into three different peaks and found that two characteristic peaks of Mo  $3d_{5/2}$  and Mo  $3d_{3/2}$  are located at 229.45 and 232.60 eV suggesting the  $\text{Mo}^{4+}$  oxidation states in  $\text{MoS}_2$ . The peak at 226.66 eV confirms the S 2s peak, which is a typical signature of 2D- $\text{MoS}_2$ . [1, 2]

### S3. X-ray diffraction

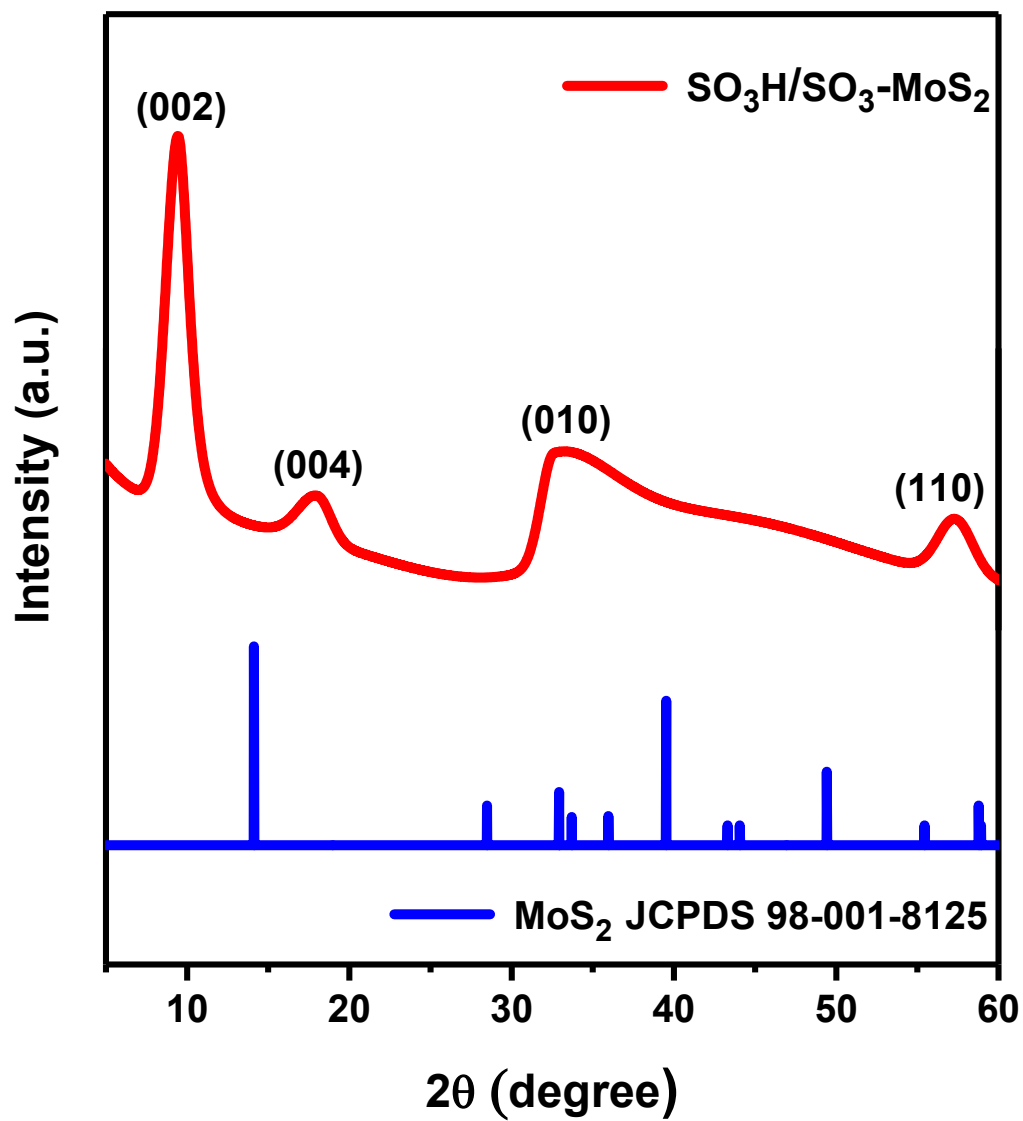

Figure S3A. Shows the XRD patterns of  $\text{SO}_3\text{H}/\text{SO}_3$  functionalized 2D- $\text{MoS}_2$

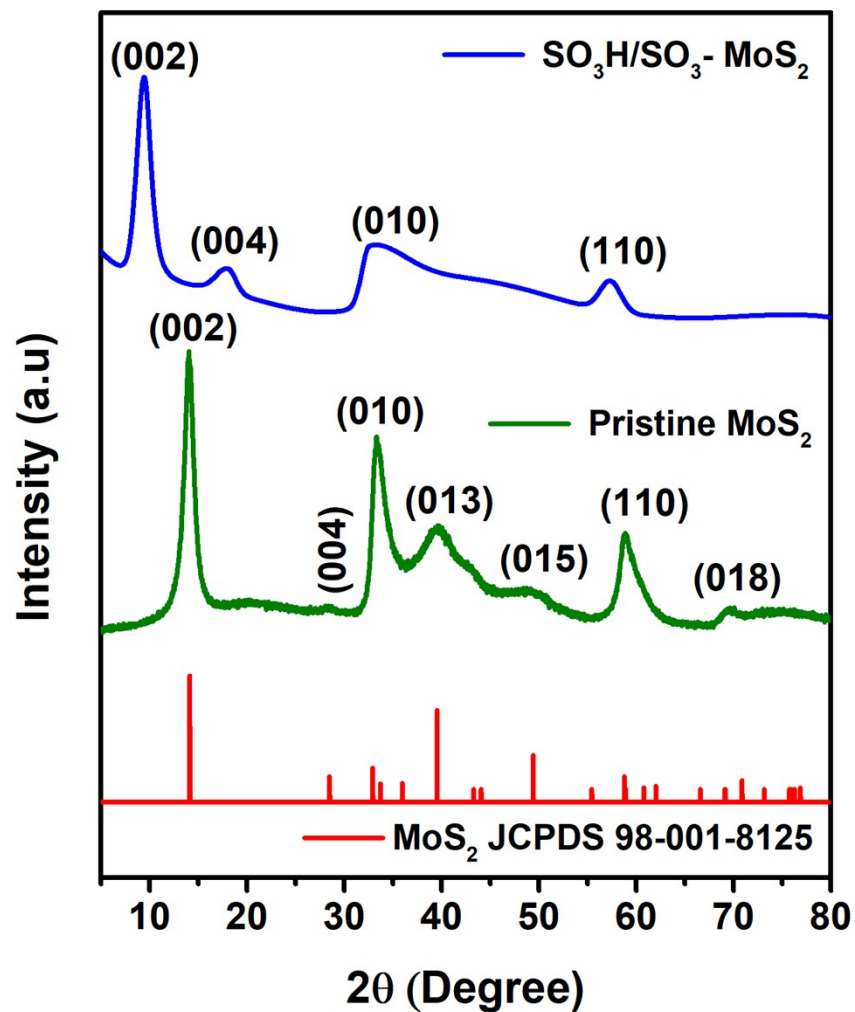

Figure S3B: XRD diffraction pattern of as-synthesized  $\text{MoS}_2$  (Pristine  $\text{MoS}_2$ ) with the interlayer spacing ( $d$ ) of 6.3 Å and  $\text{SO}_3\text{H}/\text{SO}_3\text{-MoS}_2$  with the interlayer spacing ( $d$ ) of 9.4 Å.



## S4. TEM/HETRM

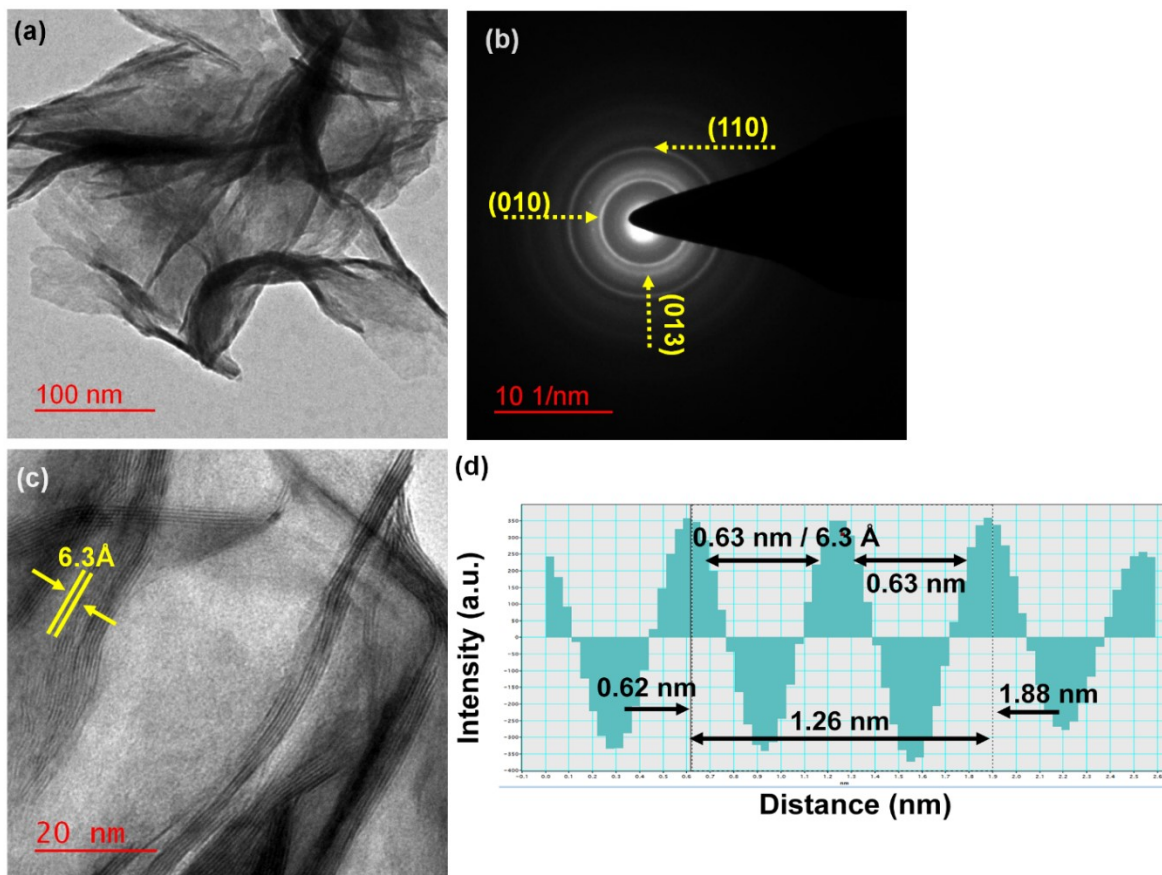

Figure S4: Shows (a) Transmission electron micrograph of pristine 2D-MoS<sub>2</sub> (i.e., P-MoS<sub>2</sub>); (b) SAED pattern of pristine 2D-MoS<sub>2</sub> depicts characteristics crystal planes of (110), (013), and (010); (c) the HRTEM images of typical few-layered 2D-MoS<sub>2</sub> with an interplanar distance of 6.3 Å; (d) line intensity profile of the line drawn in the inverse FFT image(GATAN Inc., USA).

## S5. Photocatalytic Dye-degradation

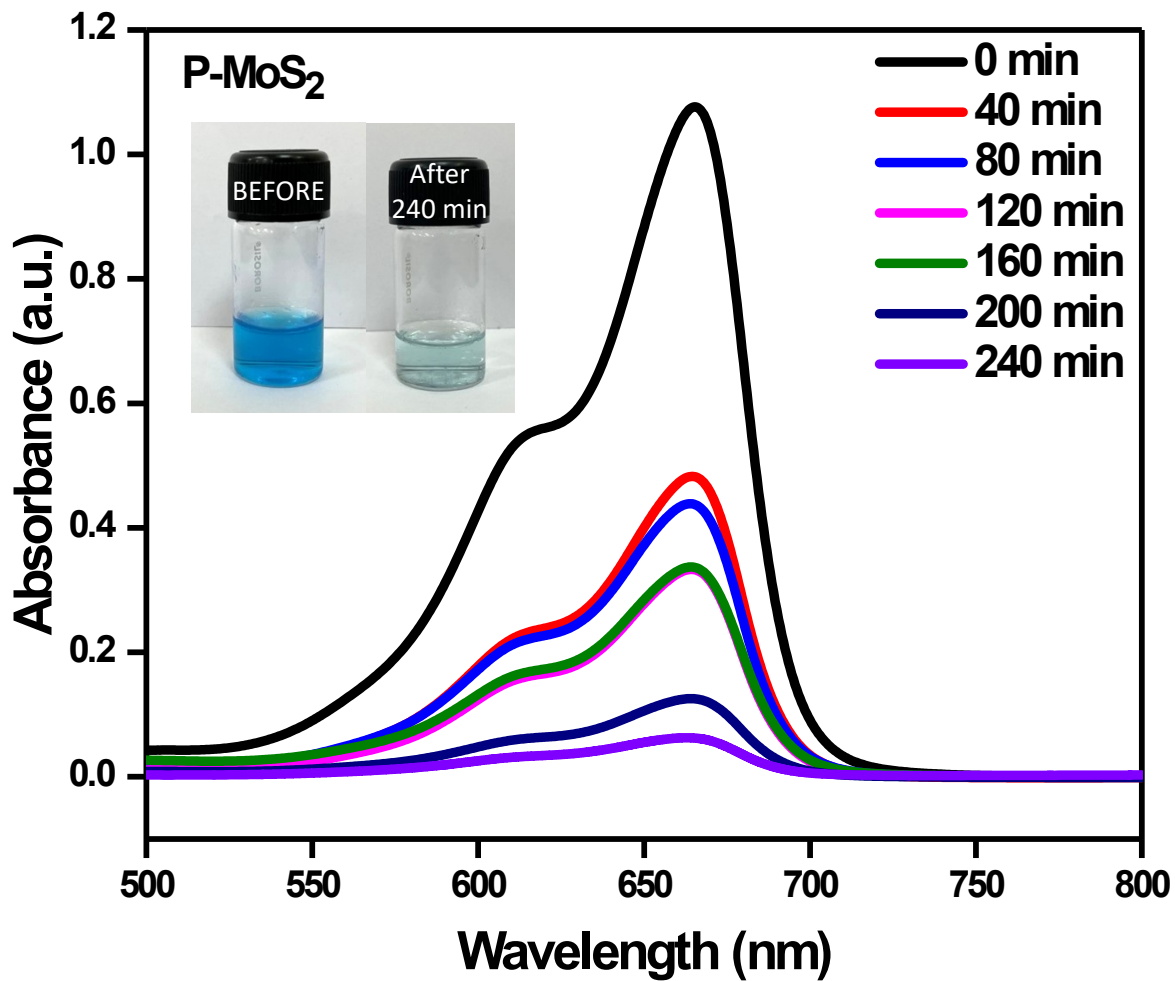

Figure S5: UV-Vis absorbance spectra as a function of time of P-MoS<sub>2</sub> in 10 ppm MB dye.

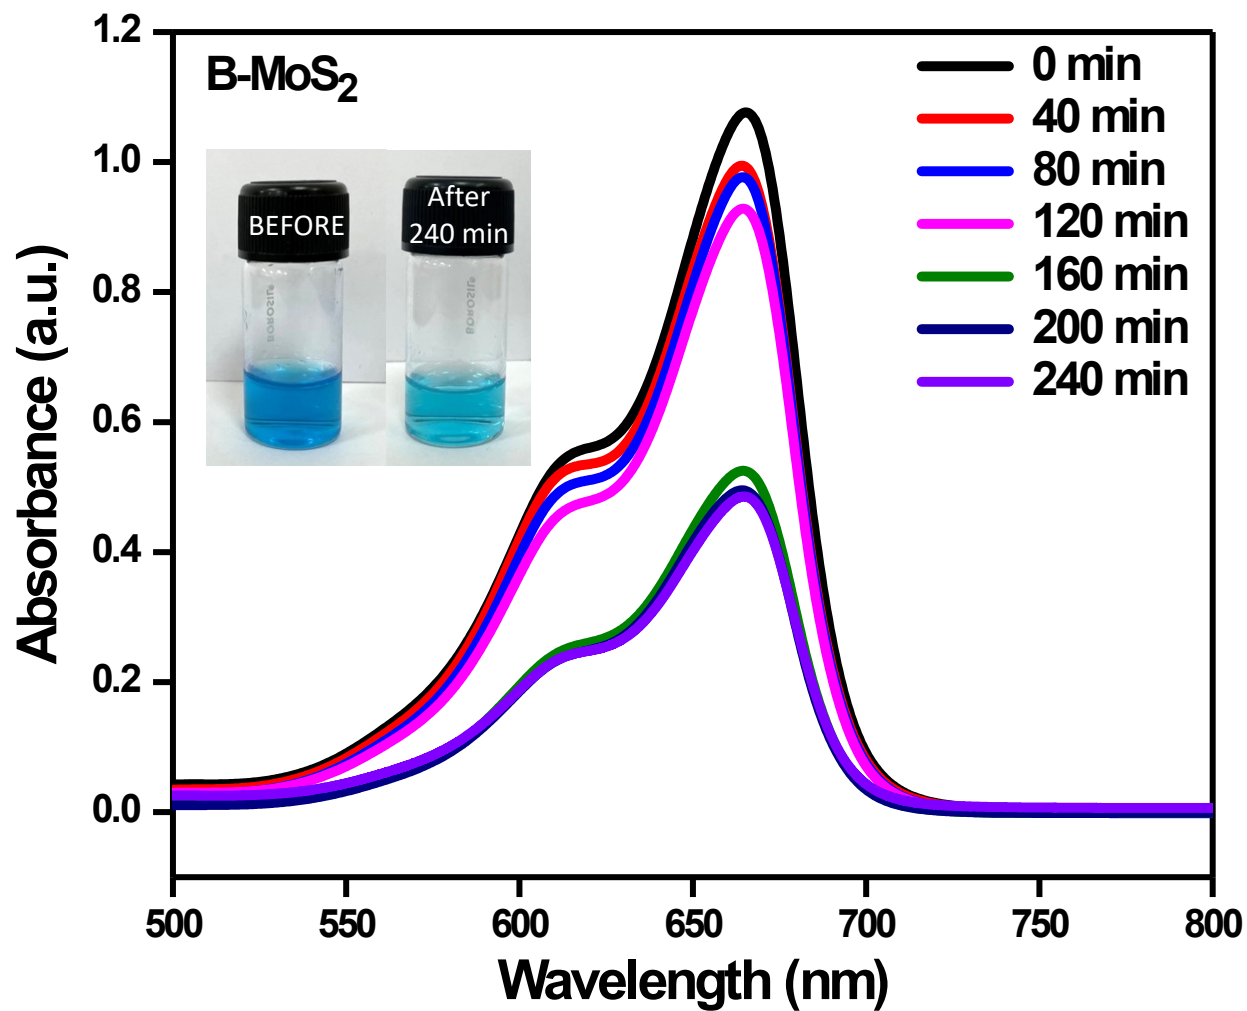

Figure S6: UV-Vis absorbance spectra as a function of time of bulk MoS<sub>2</sub> in 10 ppm MB dye solution.

## S6. Kinetics of Dye Degradation:

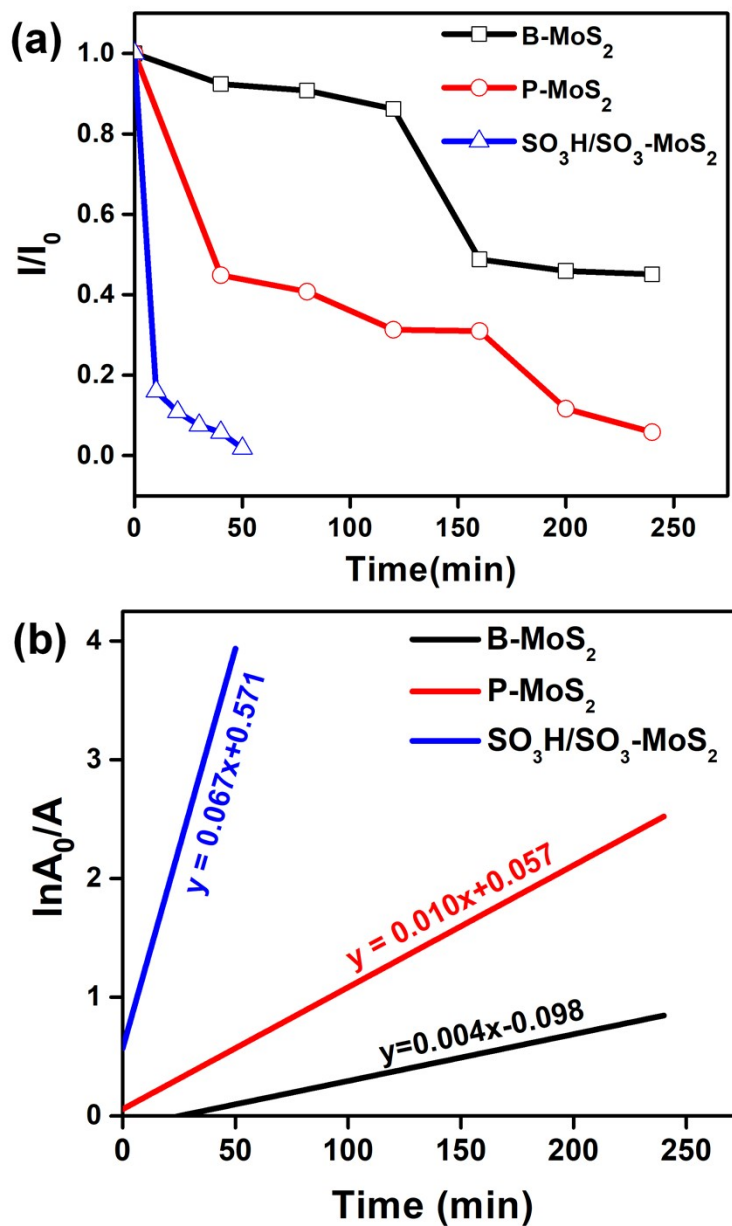

Figure S7: (a) Normalized intensity plots for  $SO_3H/SO_3-MoS_2$ , P-MoS<sub>2</sub>, B-MoS<sub>2</sub> and as a function of time illustrating the MB dye degradation rate in 10 ppm dye solution; (b) demonstrates the rate kinetics plot of photocatalytic MB degradation using  $SO_3H/SO_3-MoS_2$ , P-MoS<sub>2</sub>, and B-MoS<sub>2</sub>.

## S7. BET Surface Area:

In order to understand the better catalytic performance of  $\text{SO}_3\text{H}/\text{SO}_3$  functionalized  $\text{MoS}_2$ , compared to pristine  $\text{MoS}_2$ , BET surface area and pore size distribution of both samples were evaluated by nitrogen adsorption isotherm measurements. Both the samples exhibited typical type IV isotherm with  $\text{H}_3$  hysteresis loops attributing mesoscale pores in the materials. The BET surface area (SSA) for sulfonated  $\text{MoS}_2$  is  $23.532 \text{ m}^2/\text{g}$  which is higher compared to pristine  $\text{MoS}_2$  ( $19.719 \text{ m}^2/\text{g}$ ). The higher accessible surface area with additional surface functionality make the  $\text{SO}_3\text{H}/\text{SO}_3$  functionalized  $\text{MoS}_2$  catalytic more active for organic dye degradation compared to pristine  $\text{MoS}_2$ .

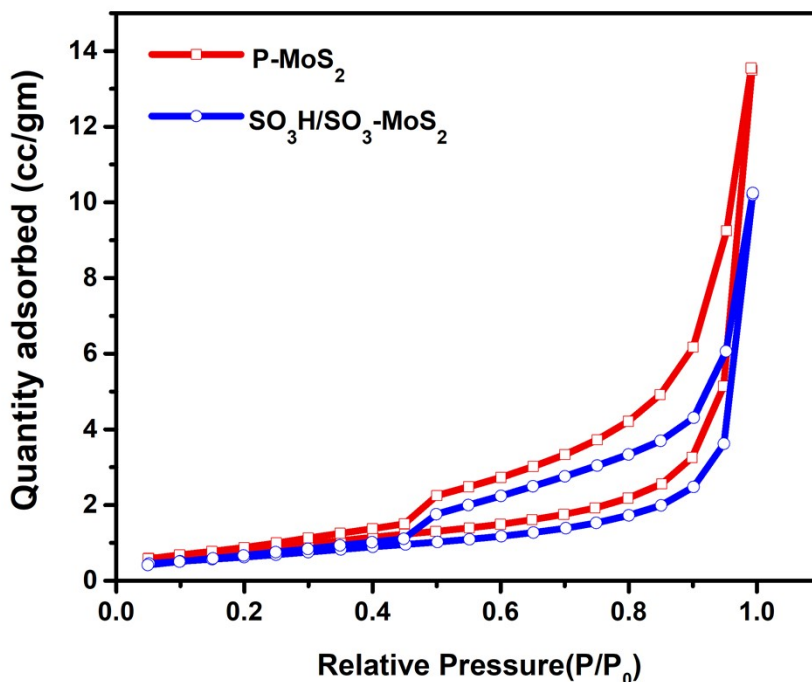

Figure S8: Illustrates the  $\text{N}_2$  adsorption/desorption isotherms data of  $\text{SO}_3\text{H}/\text{SO}_3\text{-MoS}_2$  obtained during the BET measurement

*References:*

- [1] Y. Qi, Q. Xu, Y. Wang, B. Yan, Y. Ren, and Z. Chen, "CO<sub>2</sub>-Induced Phase Engineering: Protocol for Enhanced Photoelectrocatalytic Performance of 2D MoS<sub>2</sub> Nanosheets," *ACS Nano*, vol. 10, no. 2, pp. 2903-2909, 2016/02/23 2016, doi: 10.1021/acsnano.6b00001.
- [2] Z. Liang *et al.*, "Facile preparation of metallic 1T phase molybdenum selenide as cocatalyst coupled with graphitic carbon nitride for enhanced photocatalytic H<sub>2</sub> production," *Journal of Colloid and Interface Science*, vol. 598, pp. 172-180, 2021/09/15/ 2021, doi: <https://doi.org/10.1016/j.jcis.2021.04.066>.
